# Supplementary material
Source: publisher site journal article supplement (https://www.spandidos-publications.com/4263/downloadSupplementary)

Figure S1. Monosaccharide content of the polysaccharides extracted from soybean hull. (A) Crude, (B) F1, (C) F2 and (D) F3 extracts.

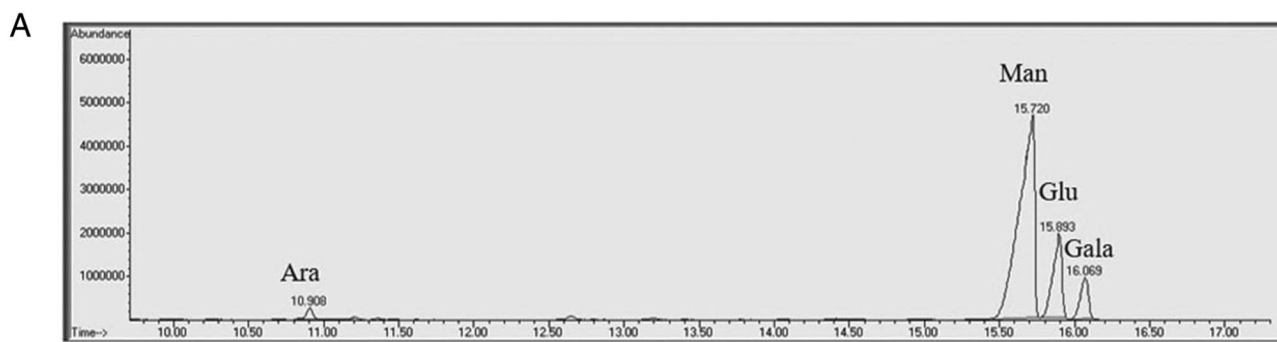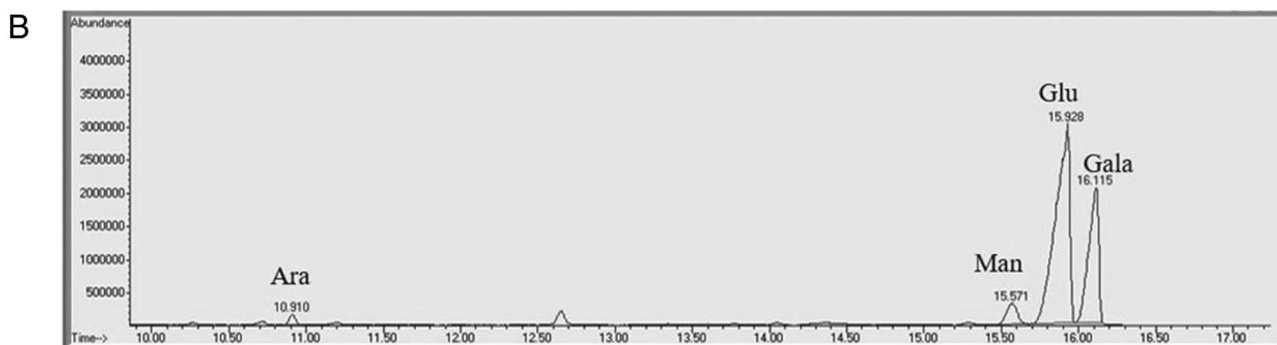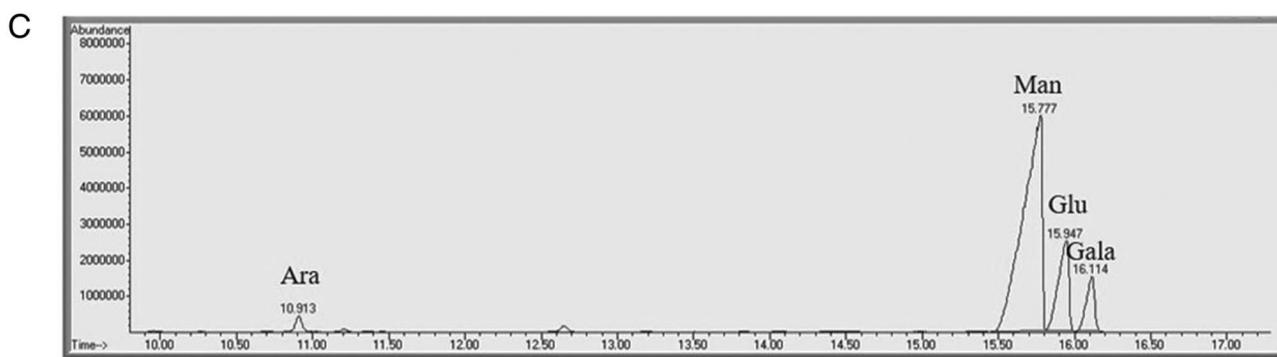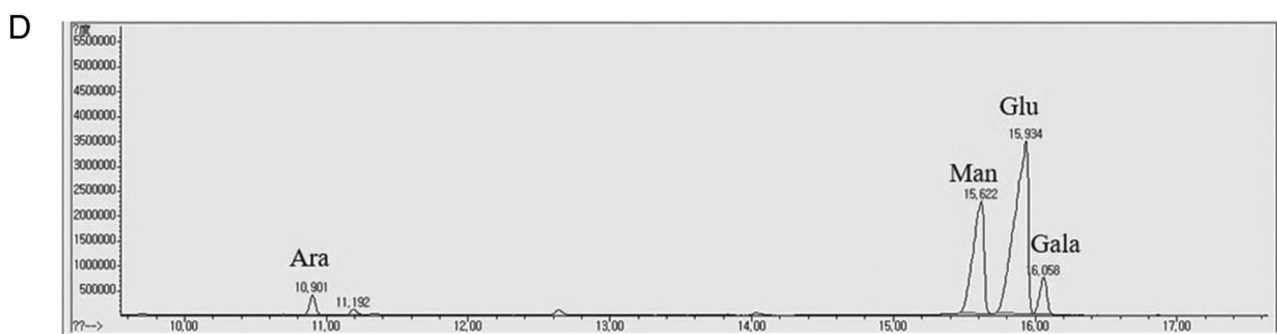

Supplement: Supplementary file 1 [file downloadSupplementary]
